# Supplementary material
Source: PubMed Central journal article supplement (PMC6521689)
Supplement: NIHMS1024757-supplement-SI.pdf [file NIHMS1024757-supplement-SI.pdf]

*Supplemental Information*

**Noninvasive Imaging and Quantification of Radiotherapy-Induced PD-L1 Upregulation  
with <sup>89</sup>Zr-Df-atezolizumab**

Emily B. Ehlerding<sup>†</sup>, Hye Jin Lee<sup>‡</sup>, Todd E. Barnhart<sup>†</sup>, Dawei Jiang<sup>§</sup>, Lei Kang<sup>§</sup>, Douglas G. McNeel<sup>□,^</sup>, Jonathan W. Engle<sup>†</sup>, Weibo Cai<sup>†,‡,§,^,\*</sup>

<sup>†</sup> 1111 Highland Ave, Medical Physics Department, University of Wisconsin – Madison, Madison, WI, USA 53705

<sup>‡</sup> 777 Highland Ave, Pharmaceutical Sciences Department, University of Wisconsin – Madison, Madison, WI, USA 53705

<sup>§</sup> 600 Highland Ave, Radiology Department, University of Wisconsin – Madison, Madison, WI, USA 53792

<sup>□</sup> 1685 Highland Ave, Department of Medicine, University of Wisconsin – Madison, Madison, WI, USA 53705

<sup>^</sup> 600 Highland Ave, Carbone Cancer Center, University of Wisconsin – Madison, Madison, WI, USA 53792

\*To whom correspondence should be addressed: Dr. Weibo Cai; 1111 Highland Avenue, Madison, WI 53705; [WCai@UWHealth.org](mailto:WCai@UWHealth.org); 608-262-1749.

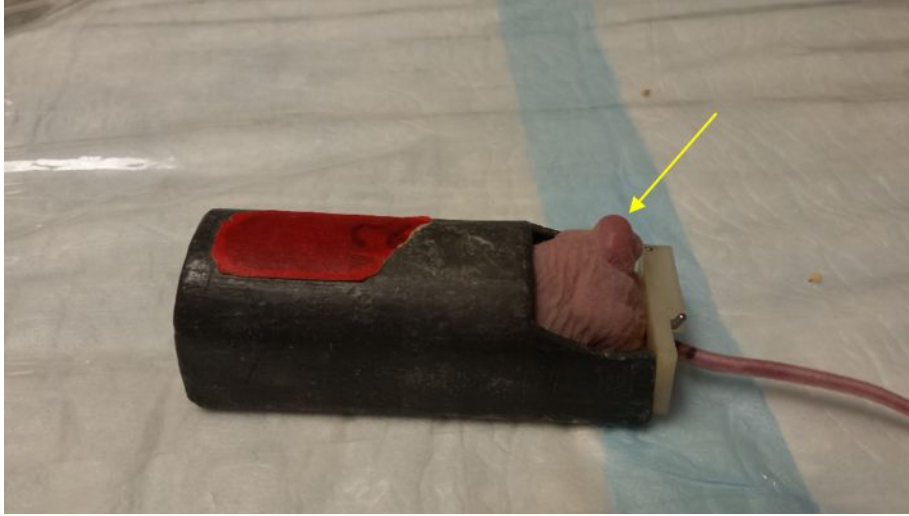

*Figure S1. Setup for irradiation of mice in lead shield.*

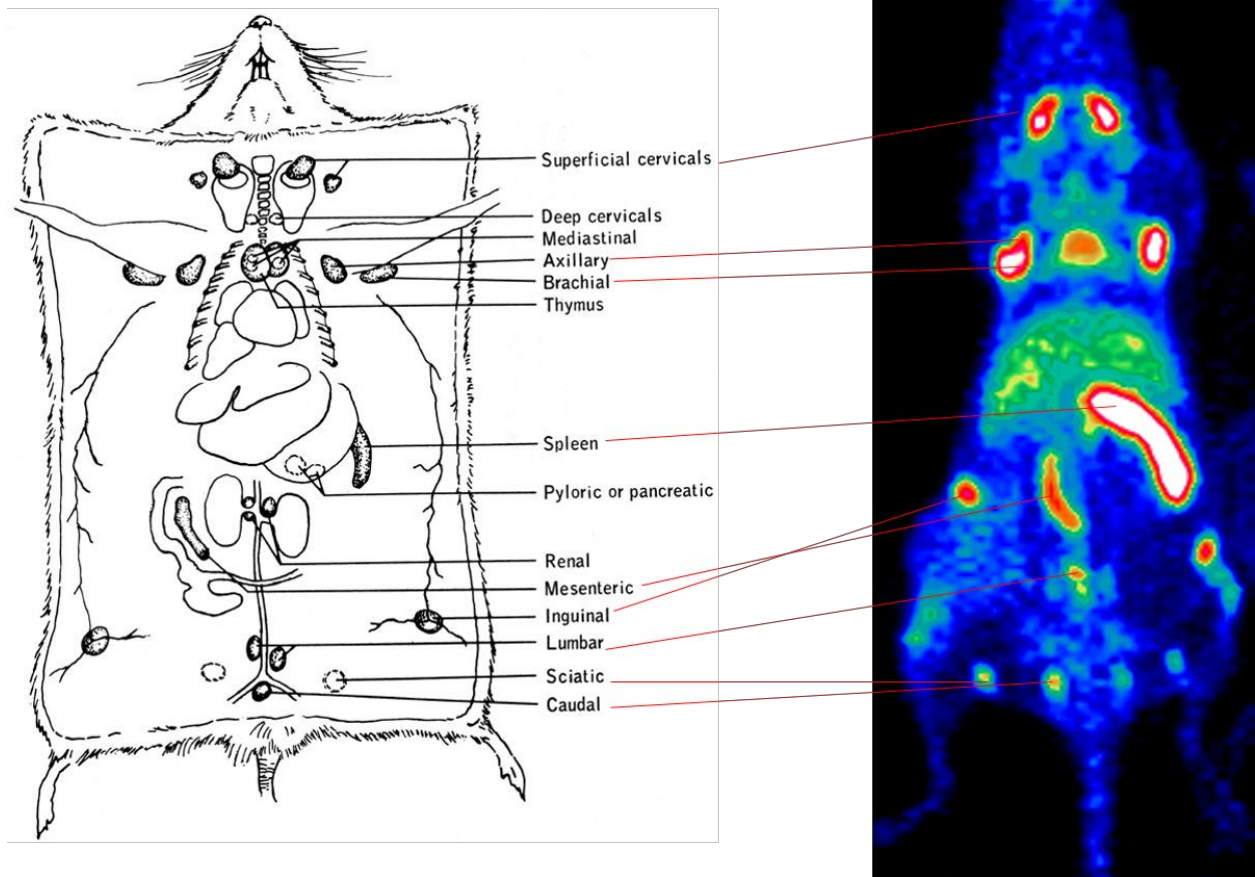

**Figure S2.** Many lymph nodes were clearly visible on  $^{89}\text{Zr}$ -Df-atezolizumab PET images.

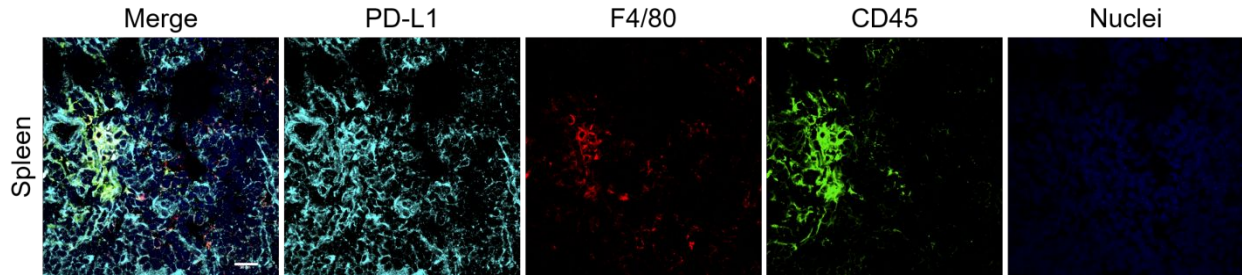

**Figure S3.** Staining of spleen tissue verified high PD-L1 and immune cell presence. Magnification: 60x. Scale bar = 20  $\mu$ m.

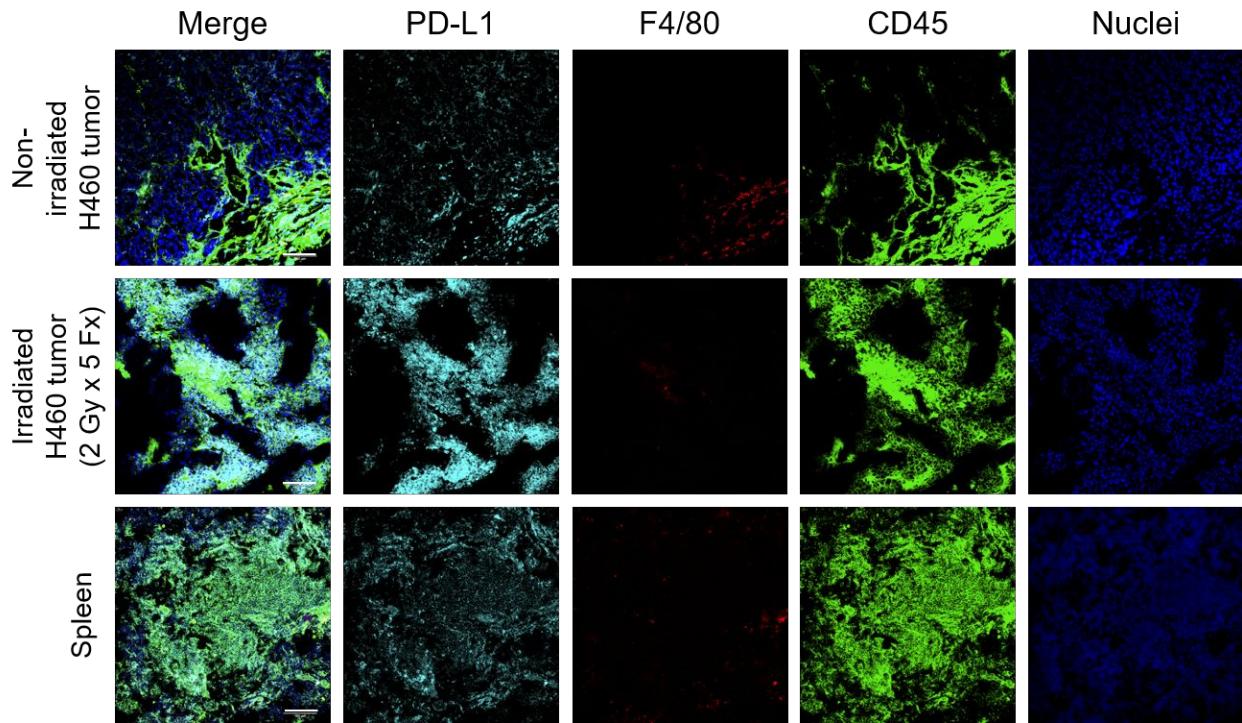

**Figure S4.** Immunofluorescent staining of peripheral H460 tumor slices before and after fractionated radiotherapy and the spleen at 20x magnification. Scale bar = 100  $\mu$ m.

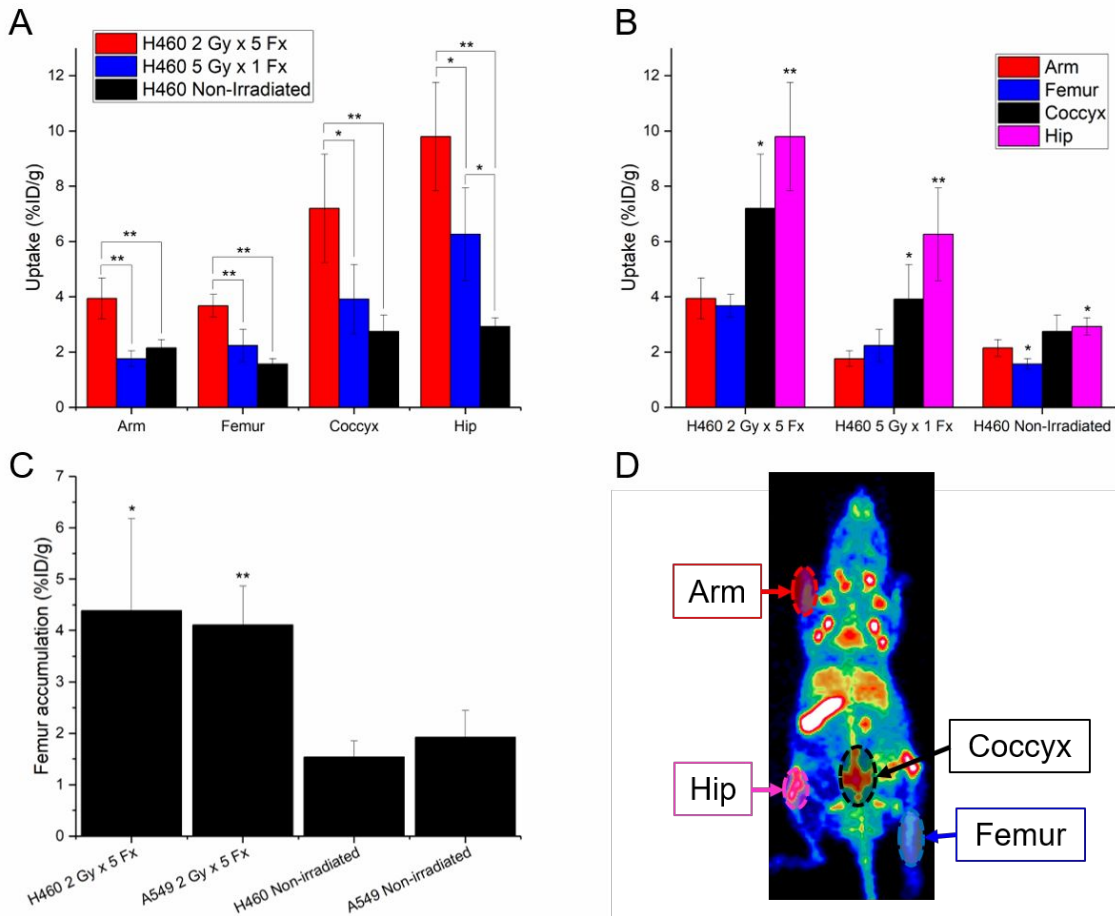

**Figure S5.** Comparison of bone uptakes of  $^{89}\text{Zr}$ -Df-atezolizumab. (A) Statistically higher accumulation of the tracer was noted following fractionated radiotherapy in all bones/joints as determined through PET ROI analysis.  $*p < 0.05$ ;  $**p < 0.01$ . (B) Statistically higher accumulation was noted in the hip and coccyx relative to the arm, particularly following radiotherapy.  $*p < 0.05$ ;  $**p < 0.01$ , relative to accumulation in arm. (C) Similar trends were noted in ex vivo gamma-counting biodistribution studies of tracer accumulation in the femur, with higher values measured after radiotherapy.  $*p < 0.05$ ;  $**p < 0.01$ , relative to non-irradiated femur accumulation in same tumor model. (D) Approximate location of ROIs in PET images.
